# Supplementary material
Source: publisher figshare collection journal article supplement (https://acs.figshare.com/ndownloader/files/7722235)
Supplement: Supplementary file 1 [file 7722235]

# Supporting Information For:

## A Membrane Anchored DNA Assembly For Energy And Electron Transfer

*Karl Börjesson,<sup>†</sup> John Tumpene,<sup>†</sup> Thomas Ljungdahl,<sup>†</sup> L. Marcus Wilhelmsson,<sup>†</sup> Bengt Nordén,<sup>†</sup> Tom Brown,<sup>‡</sup> Jerker Mårtensson<sup>†</sup> and Bo Albinsson<sup>†\*</sup>*

<sup>†</sup>Department of Chemical and Biological Engineering, Chalmers University of Technology, SE-41296  
Gothenburg, Sweden

<sup>‡</sup>School of Chemistry, University of Southampton, Highfield, Southampton, SO17 1BJ, UK

Email: balb@chalmers.se

Telephone: +46-(0)31-7723044

Fax: +46-(0)31-7723858

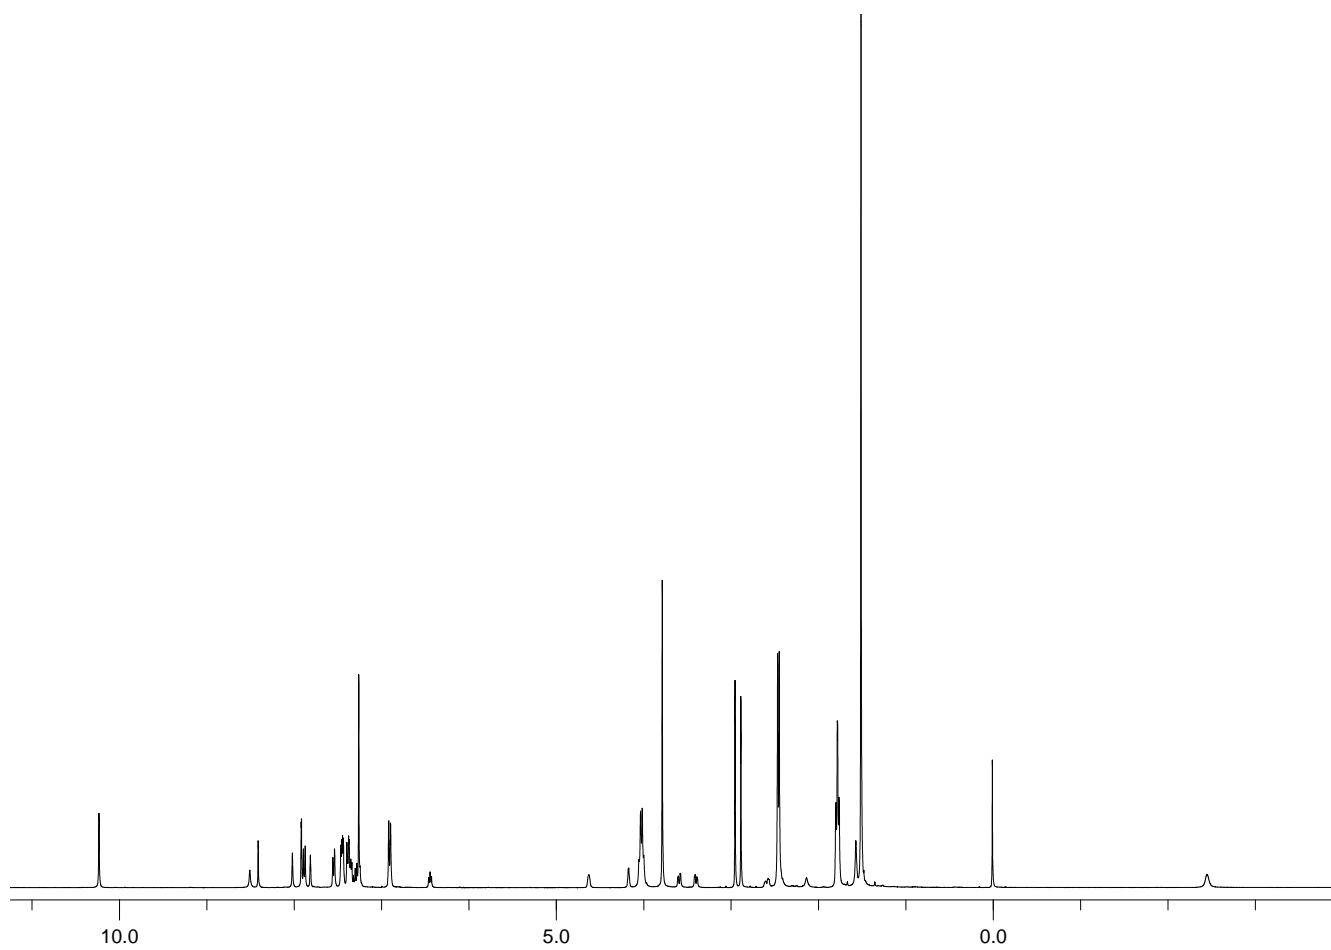

**Figure S1.**  $^1\text{H}$  NMR of **2** in  $\text{CDCl}_3$ .

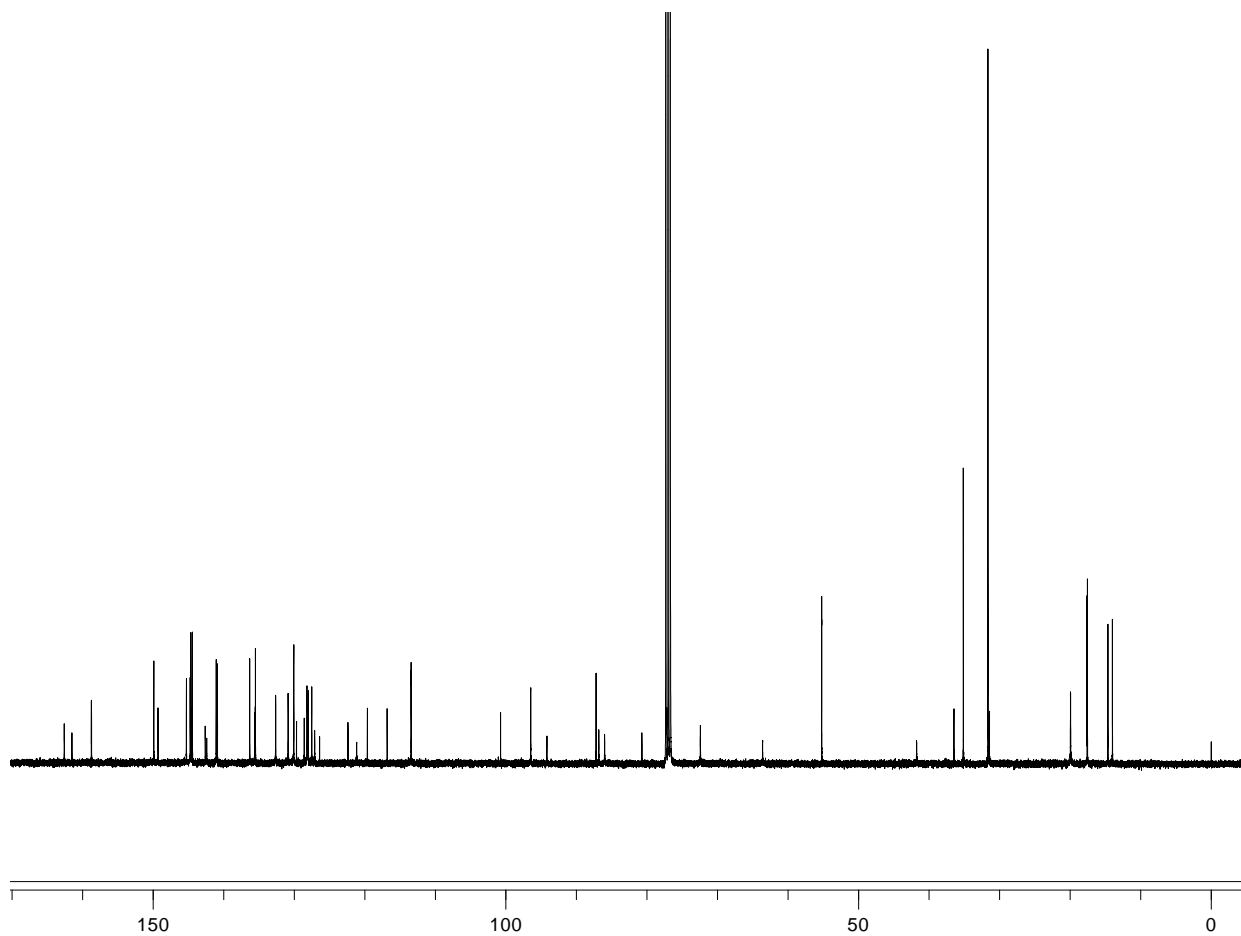

**Figure S2.**  $^{13}\text{C}$  NMR of **2** in  $\text{CDCl}_3$ .

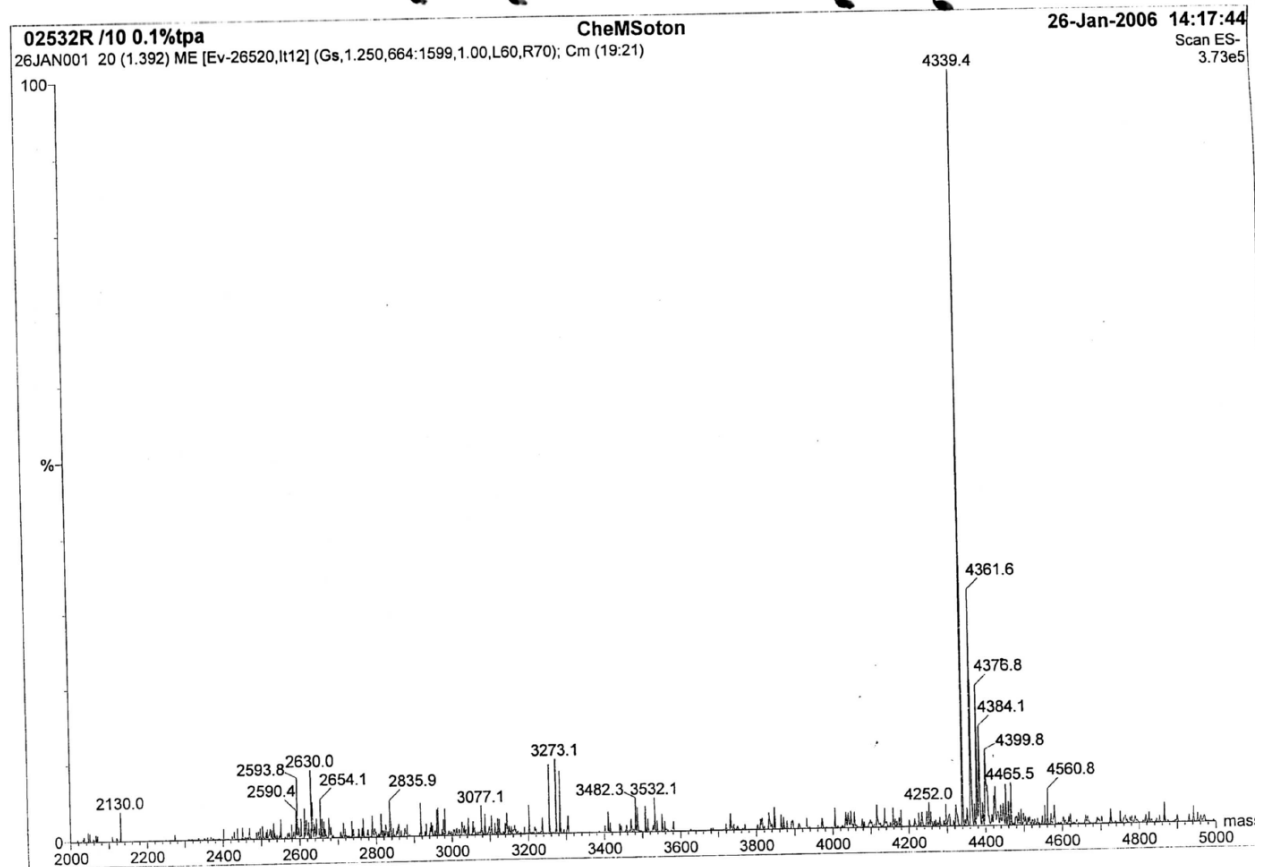

**Figure S3.** MALDI-TOF of test sequence with 11 normal dT and the porphyrin-dT ( $C_{173}H_{216}N_{28}O_{82}P_{11}$ ).

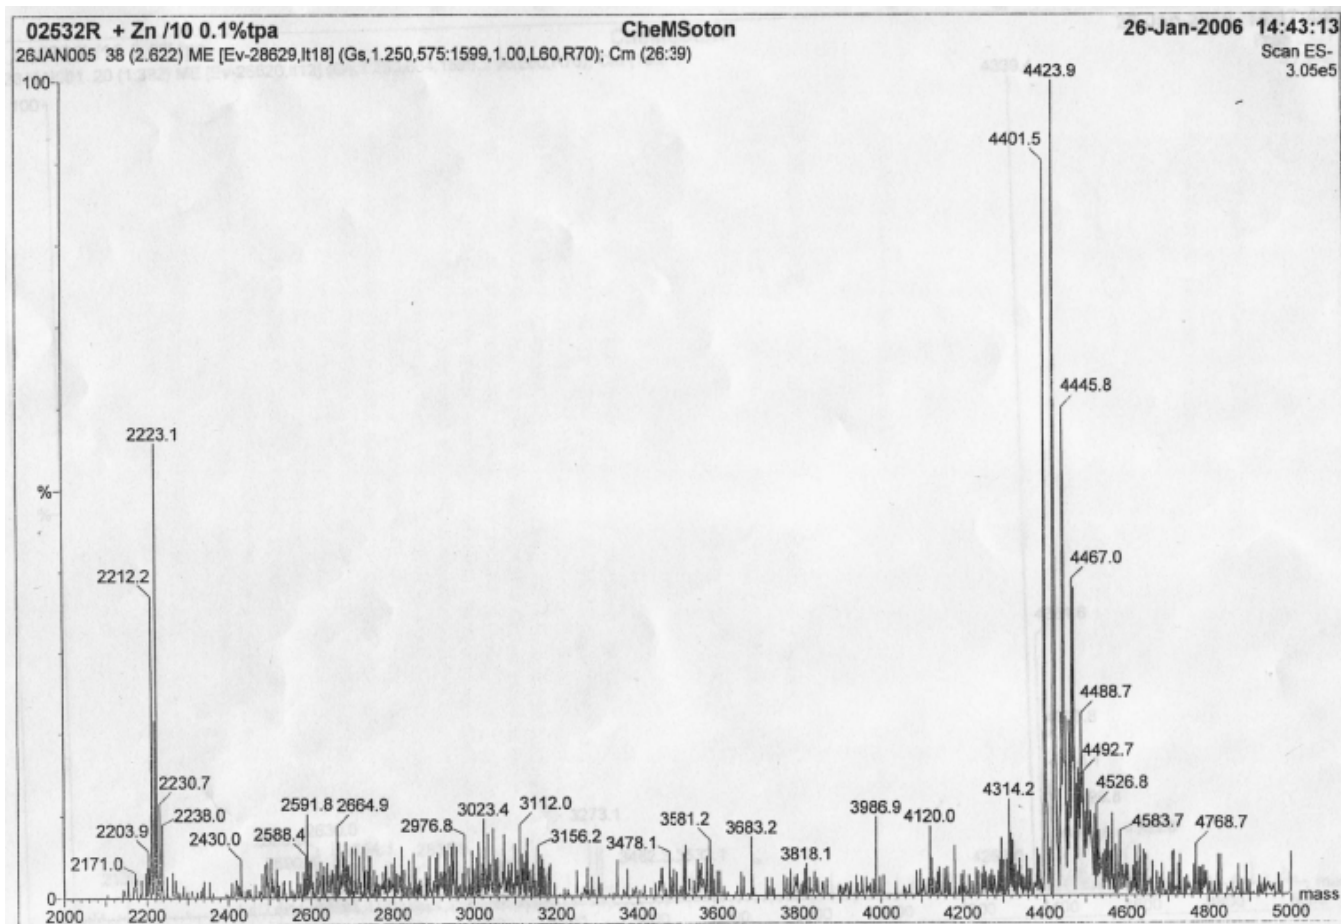

**Figure S4.** MALDI-TOF of test sequence with 11 normal dT and the zinc-porphyrin-dT ( $C_{173}H_{214}N_{28}O_{82}P_{11}Zn$ ).
